# Supplementary material
Source: publisher figshare collection journal article supplement (https://tandf.figshare.com/ndownloader/files/20284749)
Supplement: Supplementary file 1 [file 20284749]

## Sheet: Outcomes -a
		Activities						Enablers					Principles
	Letter reflist	Emotional support	Involvement of family and friends	Patient empowerment	Patient information	Patient involvement	Physical support	Access to care	Patient clinician communication	Coordination and continuity	Integration of medical and non-medical	Teamwork	Bio-psychosocial	Patient clinian relationship	Clinician characteristics	Patient as a unique person
	A								x		x	x
	B
	C												x
	D		x		x				x						x
	E			x	x		x				x	x	x	x	x	x
	F*			x		x			x					x	x	x
	G	x
	H												x			x
	I				x				x	x			x
	J								x					x	x	x
	K	x	x	x		x			x				x	x		x
	L*
	M*															x
	N	x							x				x	x	x	x
	O												x		x	x
	P		x		x								x	x	x	x
	Q*															x
	R														x
	S	x	x			x	x						x	x	x	x
	T				x			x	x				x		x	x
	U*
	V														x	x
	W	x	x				x	x	x	x		x	x	x	x	x
	X*				x				x
	Y								x				x	x		x
	Z	x	x	x		x		x		x	x	x	x	x	x	x
	AA							x	x				x	x	x	x
	BB														x
	CC														x	x
	DD		x										x	x	x	x
	EE		x												x	x
	FF	x	x		x		x		x	x		x	x	x	x	x
	7 a: An overview of the dimensions (Scholl, 2014) of the outcome patient-centeredness described in the included articles. Sometimes, in coding the papers, we found that authors used patient-centeredness terms but not clearly one of dimensions. These papers are indicated with an asterix.
